# Supplementary material for: Terroir Influence on Polyphenol Metabolism from Grape Canes: A Spatial Metabolomic Study at Parcel Scale
Source: MDPI journal article supplement (doi:10.3390/molecules28114555), 2023-06-05
Supplement: s1 [file s1]

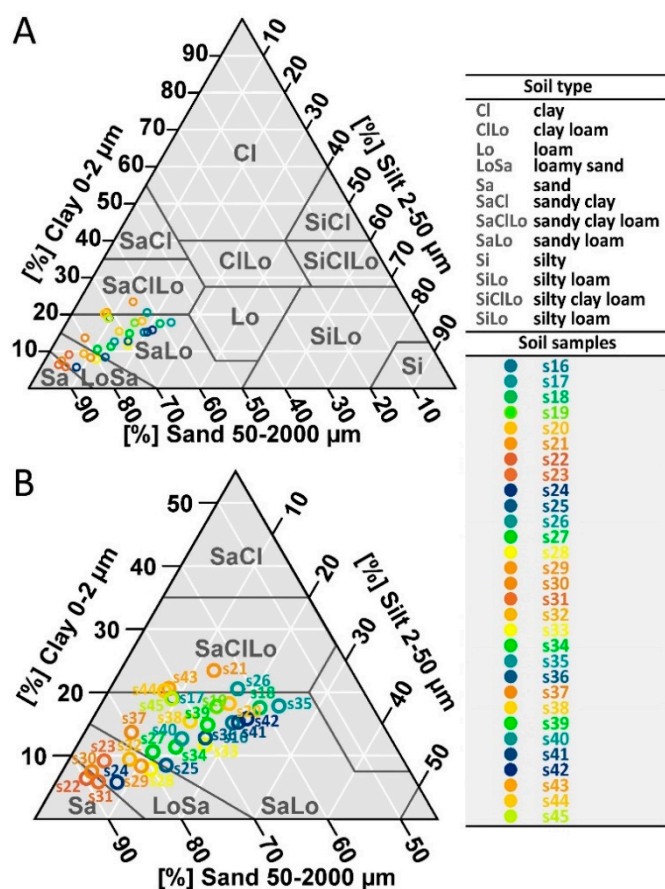

**Figure S1.** Soil particles proportion as global USDA texture triangle (A) and with a focus on sandy soil part (B). Sampling points were projected as colored circles. CI: Clay, Sa: Sand, Si: Silt, Lo: Loam.

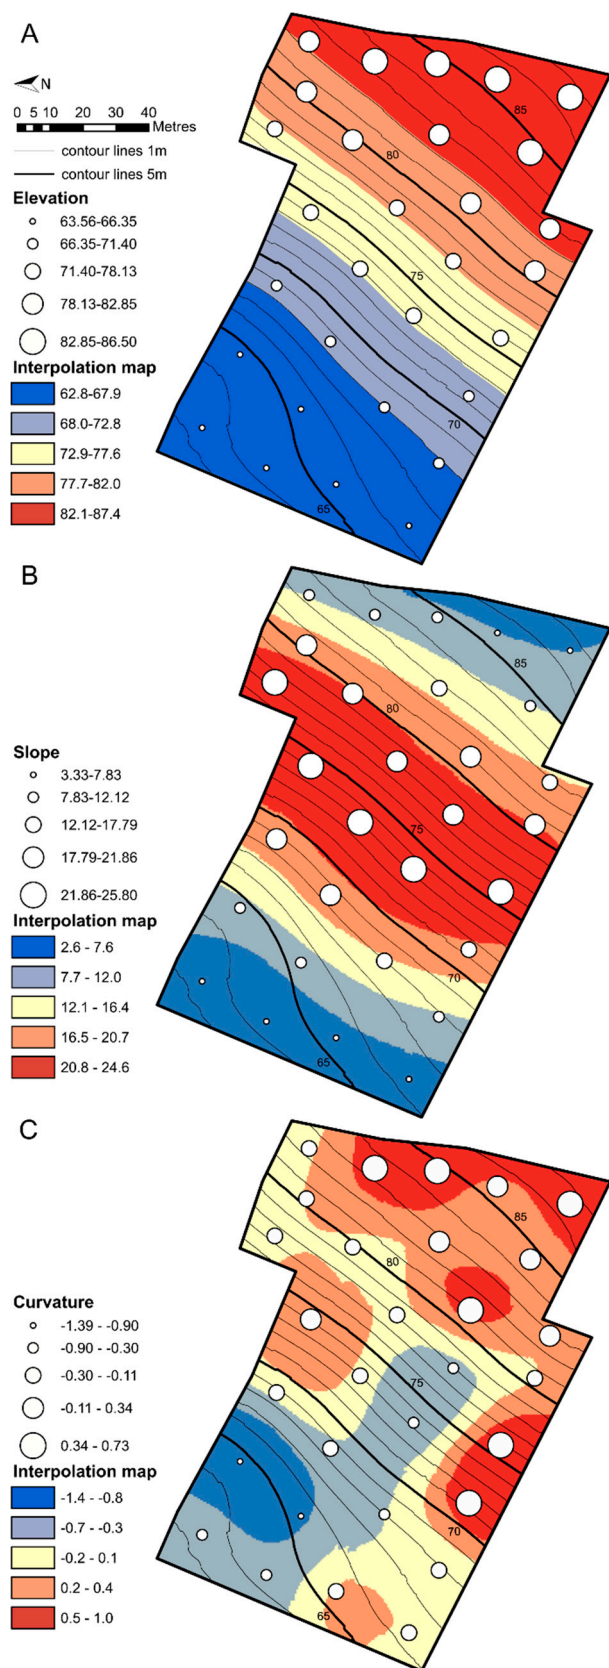

**Figure S2.** Spatial representations of topographic variations.

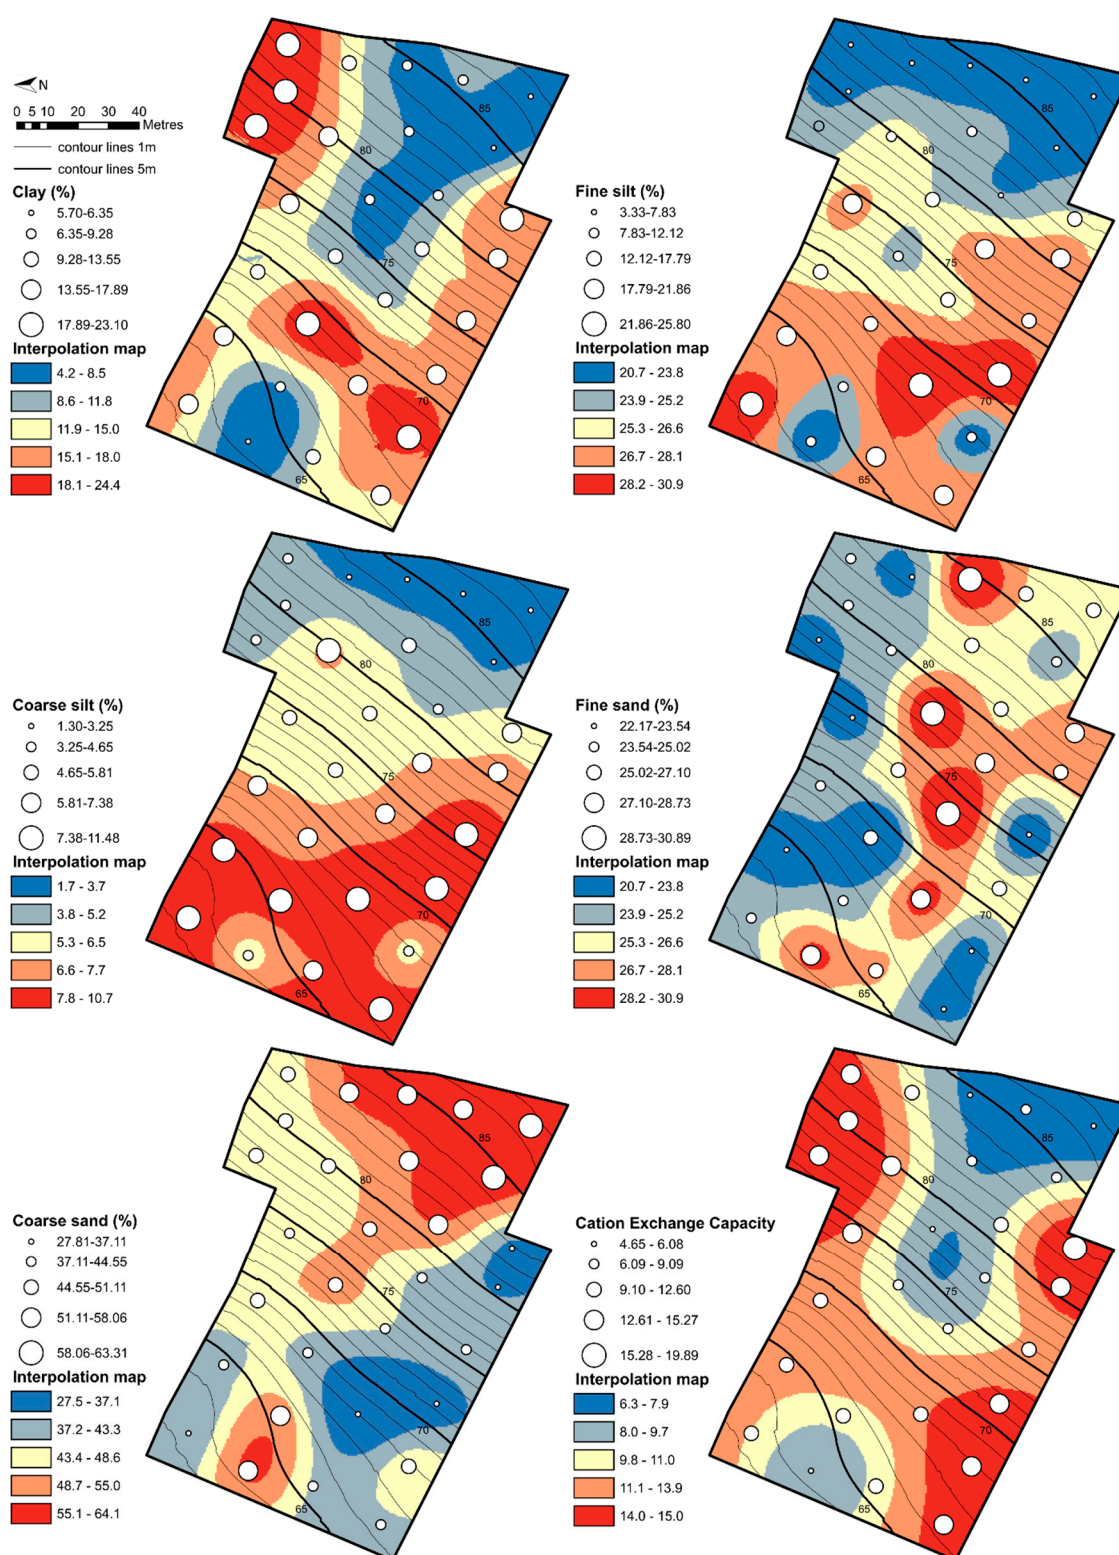

Figure S3. Spatial representation of the soil texture and the cation exchange capacity.

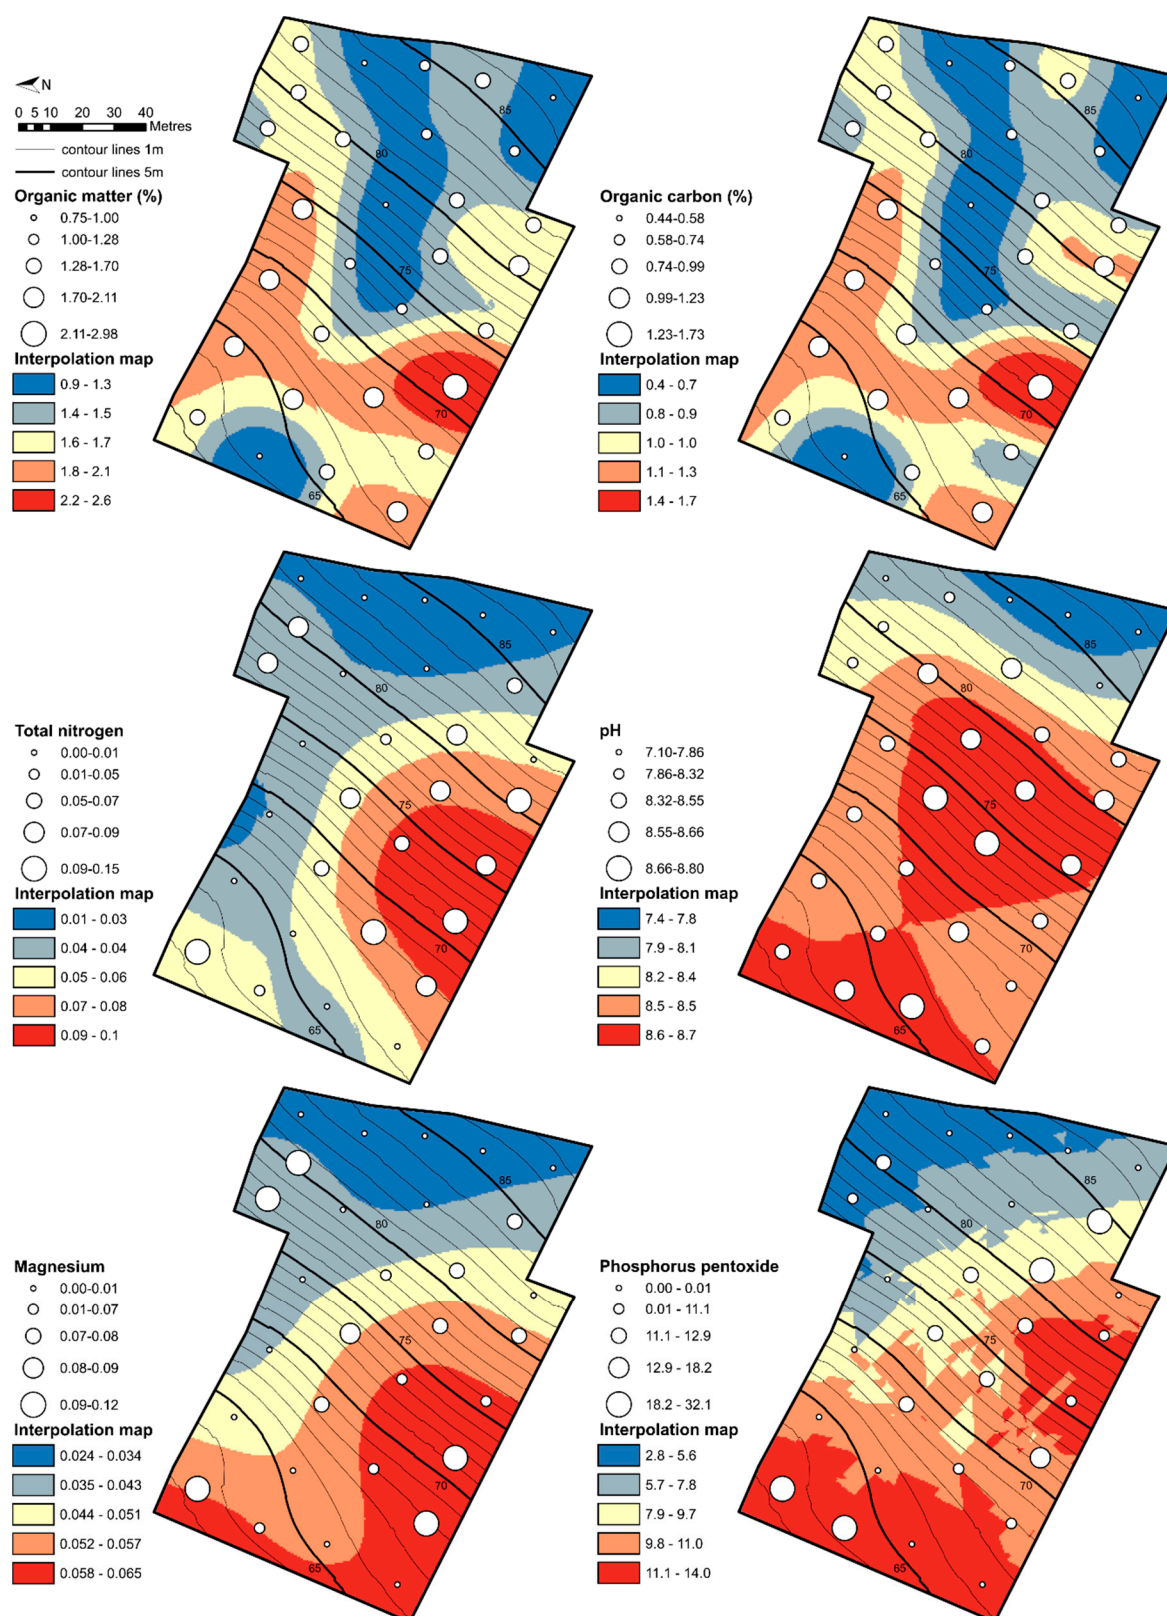

Figure S4. Spatial representation of the soil chemical properties.



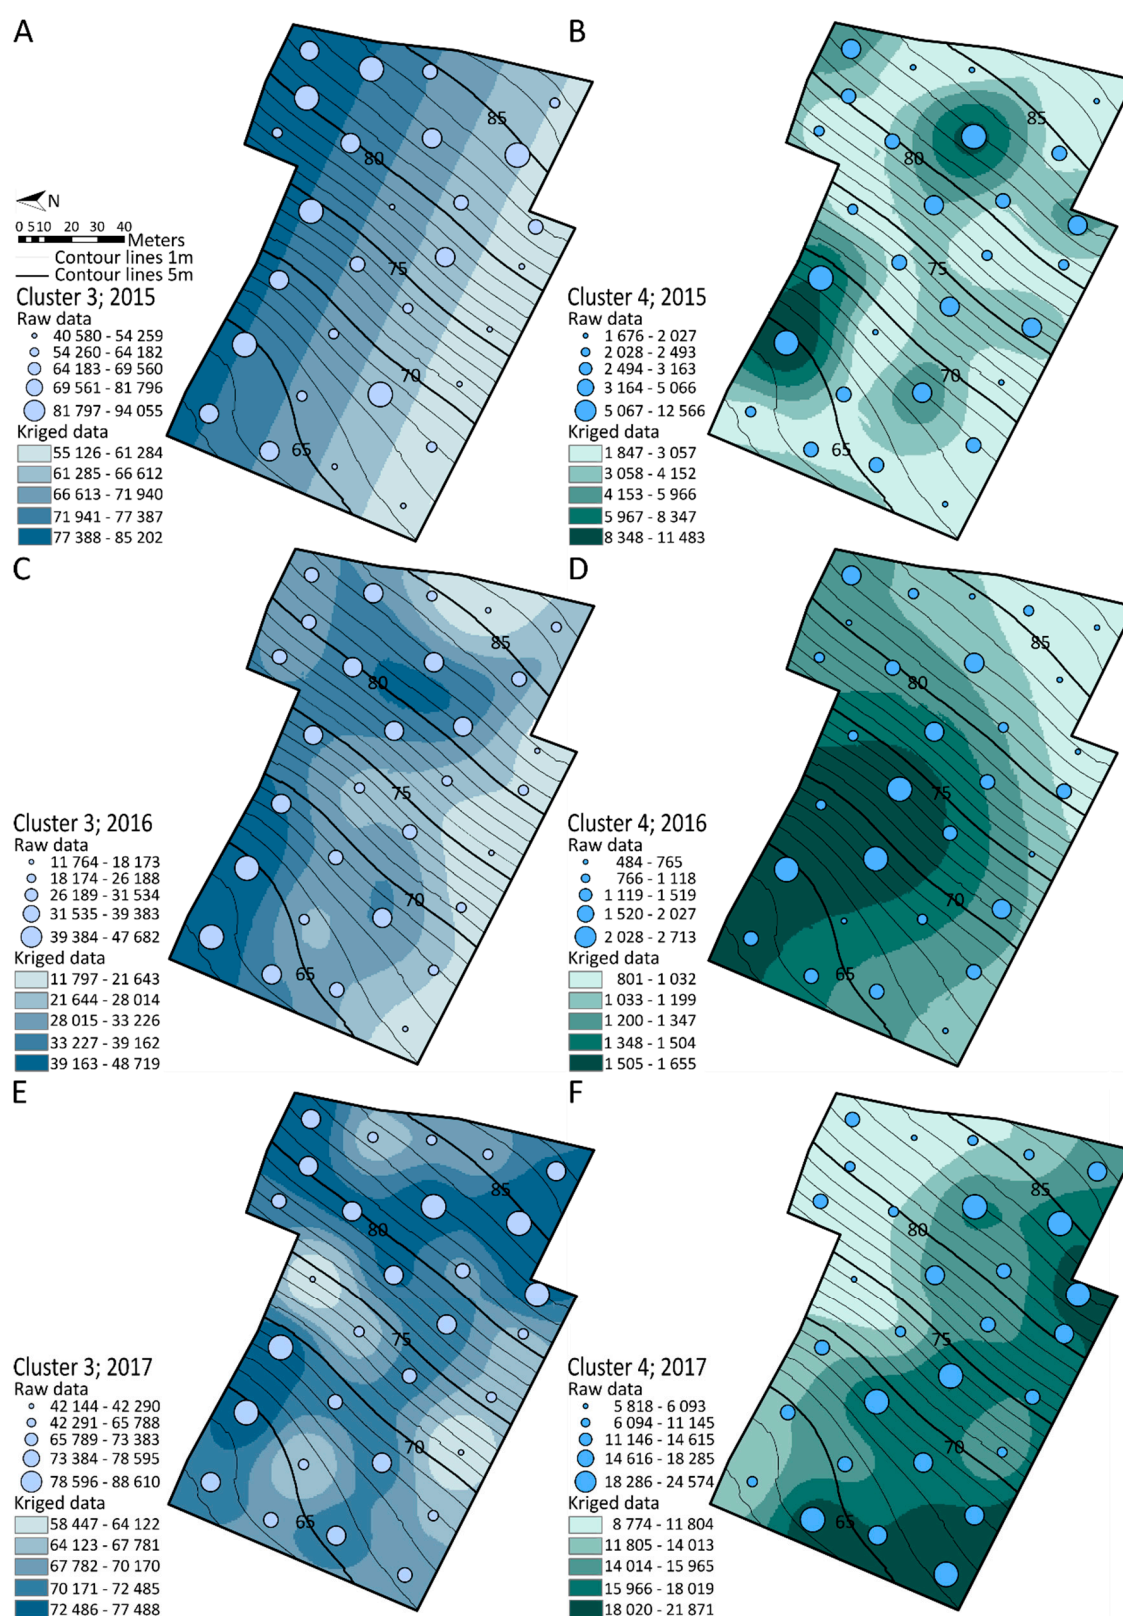

**Figure S5.** Spatial representation of conserved metabolic clusters in 2015 (A, B), 2016 (C, D) and 2017 (E, F). Cluster 3 composed of stilbenoid DP2 and DP3 (A, C, E). Cluster 4 composed of stilbenoid DP3 (B, D, F).

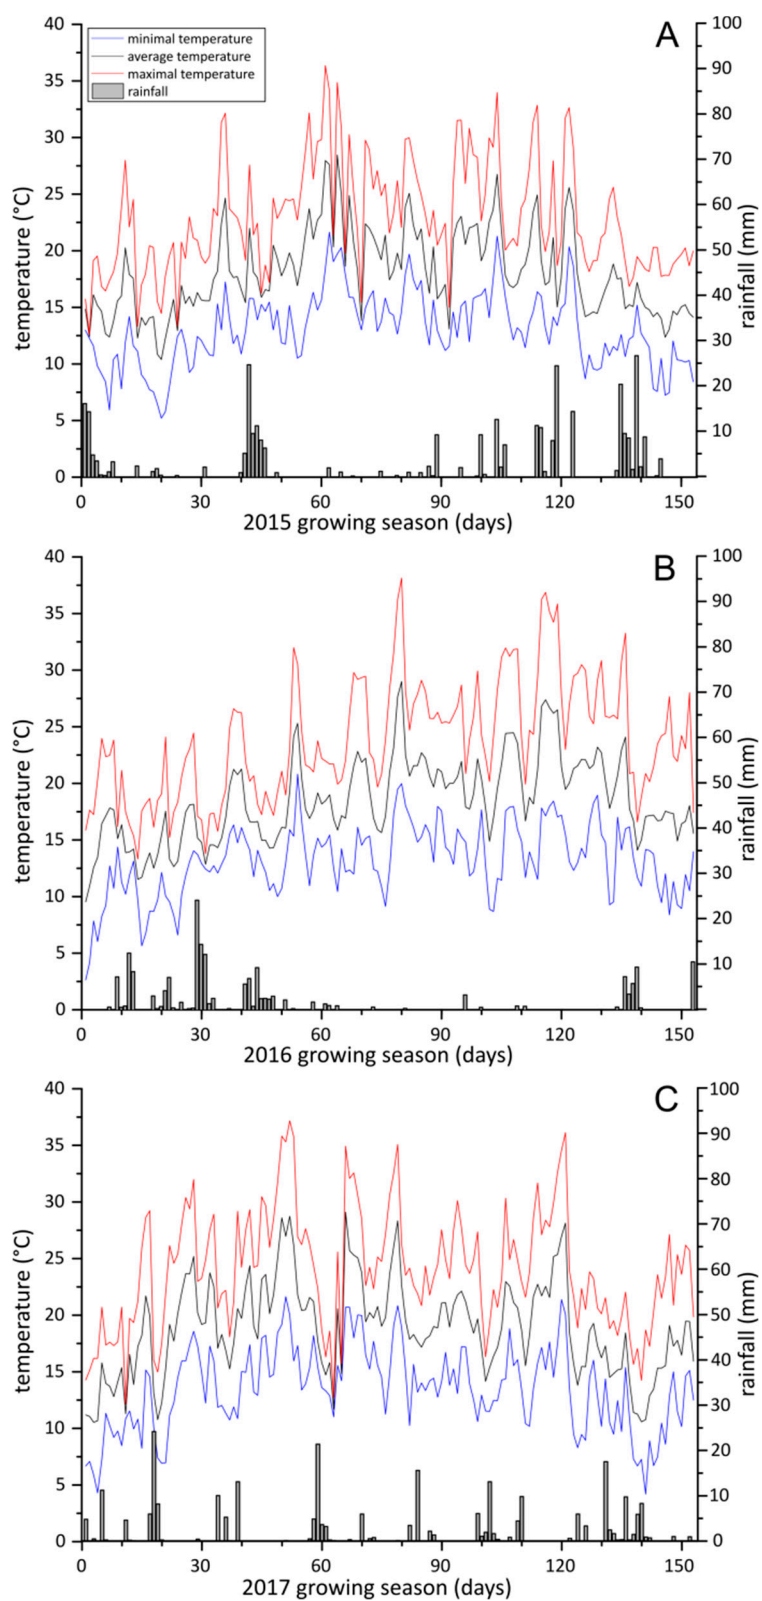

**Figure S6.** Vineyard climatic conditions during the 2015 (A), 2016 (B) and 2017 (C) growing seasons from May to September as daily minimal, average and maximal temperature (°C) and daily rainfall (mm).

**Table S1.** List of grape cane polyphenols identified in the Cabernet-Franc clone.

| Peak | RT<br>(min) | Phenolic class | Compound assign-<br>ment     | m/z<br>[M-H] <sup>-</sup> | Product ions<br>(ES <sup>-</sup> ) | m/z<br>[M+H] <sup>+</sup> | λ <sub>max</sub> (nm) | Authentication                                          |
|------|-------------|----------------|------------------------------|---------------------------|------------------------------------|---------------------------|-----------------------|---------------------------------------------------------|
| 1    | 1.91        | Phenolic acid  | gallic acid                  | 169                       | 79, 97, 78                         |                           | 269                   | Standard                                                |
| 2    | 3.22        | Phenolic acid  | caffeic acid                 | 179                       | 135, 79                            |                           | 327                   | Standard                                                |
| 3    | 9.56        | Stilbenoid DP1 | <i>E</i> -resveratrol        | 227                       | 143, 185                           | 229                       | 305, 317              | Standard                                                |
| 4    | 7.84        | Stilbenoid DP1 | <i>E</i> -piceatannol        | 243                       | 159, 201                           | 245                       | 322                   | Standard                                                |
| 5    | 4.26        | Flavonoid      | catechin                     | 289                       | 203, 123                           | 291                       | 229, 278              | Standard                                                |
| 6    | 5.39        | Flavonoid      | epicatechin                  | 289                       | 203, 123, 109                      | 291                       | 229, 278              | Standard                                                |
| 7    | 3.81        | Flavonoid      | galocatechin                 | 305                       | 125, 179                           | 307                       | 332, 369              | Standard                                                |
| 8    | 8.77        | Stilbenoid DP1 | <i>E</i> -piceid             | 389                       | 227, 185                           |                           | 278,7                 | Standard                                                |
|      |             |                |                              |                           |                                    |                           |                       | Vrhovsek <i>et al.</i> , 2012; Ehrhardt <i>et al.</i> , |
| 9    | 7.27        | Flavonoid      | epicatechin-3-O-gallate      | 441                       | 289, 169, 125                      | 443                       | 276,7                 | 2014                                                    |
| 10   | 7.88        | Flavonoid      | astilbin                     | 449                       |                                    | 451                       | 231, 289.7            | Standard                                                |
|      |             |                |                              |                           |                                    |                           | 232sh, 279,           |                                                         |
| 11   | 8.96        | Stilbenoid DP2 | <i>Z</i> -resveratrol dimer1 | 453                       | 277, 265                           | 455                       | 285                   | Püssa <i>et al.</i> , 2006                              |
| 12   | 11.71       | Stilbenoid DP2 | <i>Z</i> -resveratrol dimer2 | 453                       | 428                                | 455                       | 225, 282.7            | Püssa <i>et al.</i> , 2006                              |
| 13   | 12.07       | Stilbenoid DP2 | <i>E</i> -ε-viniferin        | 453                       | 347, 359, 225                      | 455                       | 225sh, 323            | Standard                                                |
| 14   | 12.97       | Stilbenoid DP2 | <i>E</i> -ω-viniferin        | 453                       | 347, 359, 225                      | 455                       | 225sh, 323            | Moss <i>et al.</i> , 2013                               |
| 15   | 13.52       | Stilbenoid DP2 | <i>E</i> -δ-viniferin        | 453                       | 347, 359, 225                      | 455                       | 225sh, 309            | Standard                                                |
|      |             |                | quercetin-3-O-               |                           |                                    |                           |                       |                                                         |
| 16   | 7.73        | Flavonoid      | glucoside                    |                           |                                    | 465                       |                       | Standard                                                |
| 17   | 7.84        | Stilbenoid DP2 | ampelopsin A                 | 469                       | 451, 375, 363                      | 471                       | 281,7                 | Standard                                                |
| 18   | 9.50        | Stilbenoid DP2 | scirpusin A1                 | 469                       | 451, 395                           | 471                       | 324,7                 | Moss <i>et al.</i> , 2013, Shao <i>et al.</i> , 2007    |
| 19   | 10.86       | Stilbenoid DP2 | scirpusin A2                 | 469                       | 379, 301                           | 471                       | 321,7                 | Moss <i>et al.</i> , 2013, Shao <i>et al.</i> , 2007    |
| 20   | 6.33        | Stilbenoid DP2 | restrytisol A                | 471                       | 377, 246                           |                           | 230, 276              | Cichewicz <i>et al.</i> , 2000                          |
| 21   | 7.15        | Stilbenoid DP2 | restrytisol B                | 471                       | 379, 349                           |                           | 235, 267              | Cichewicz <i>et al.</i> , 2000                          |
| 22   | 8.52        | Stilbenoid DP2 | restrytisol 3                | 471                       | 389, 227                           |                           | 234, 330              | Cichewicz <i>et al.</i> , 2000                          |
|      |             |                | quercetin-3-O-               |                           |                                    |                           |                       |                                                         |
| 23   | 7.60        | Flavonoid      | glucuronide                  | 477                       | 301, 151                           | 479                       | 256, 354              | Standard                                                |
| 24   | 3.81        | Flavonoid      | procyanidin B1               | 577                       | 289, 425, 407                      |                           | 280, 313              | Standard                                                |
| 25   | 6.20        | Flavonoid      | procyanidin B2               | 577                       | 289, 425, 407                      |                           |                       | Standard                                                |
| 26   | 4.12        | Flavonoid      | procyanidin B3               | 577                       |                                    |                           | 280, 313              | Standard                                                |
| 27   | 4.86        | Flavonoid      | procyanidin B4               | 577                       | 289, 425, 407                      |                           |                       | Standard                                                |
|      |             |                | resveratrol dimer            |                           |                                    |                           |                       |                                                         |
| 28   | 10.36       | Stilbenoid DP2 | glycoside                    | 615                       | 453, 359                           |                           | 323                   | Püssa <i>et al.</i> , 2006; Moss <i>et al.</i> , 2013   |
| 29   | 12.99       | Stilbenoid DP3 | α-viniferin                  | 677                       | 423                                | 679                       | 230sh, 285            | Mattivi <i>et al.</i> , 2011                            |
| 30   | 10.36       | Stilbenoid DP3 | resveratrol trimer 1         | 679                       | 585, 491                           | 681                       |                       | Püssa <i>et al.</i> , 2006                              |
| 31   | 10.76       | Stilbenoid DP3 | resveratrol trimer 2         | 679                       | 585, 491                           | 681                       |                       | Püssa <i>et al.</i> , 2006                              |
| 32   | 12.39       | Stilbenoid DP3 | <i>E</i> -miyabenol C        | 679                       | 573, 451                           | 681                       | 284                   | Standard                                                |
| 33   | 12.74       | Stilbenoid DP3 | resveratrol trimer 3         | 679                       | 585, 491                           |                           |                       | Püssa <i>et al.</i> , 2006                              |
| 34   | 4.38        | Flavonoid      | procyanidin trimer           | 865                       | 664, 576                           | 867                       | 279                   | Monagas <i>et al.</i> , 2006                            |
| 35   | 12.69       | Stilbenoid DP4 | dehydrogenated               | 904                       | 679                                |                           | 295                   | Ito <i>et al.</i> , 1999                                |
|      |             |                | resveratrol tetramer         |                           |                                    |                           |                       |                                                         |

---

|    |       |                |                        |     |                            |     |          |                                                          |
|----|-------|----------------|------------------------|-----|----------------------------|-----|----------|----------------------------------------------------------|
| 36 | 10.65 | Stilbenoid DP4 | hopeaphenol            | 905 | 811, 717, 705,<br>451, 359 | 907 | 281,6    | Standard                                                 |
| 37 |       |                |                        |     | 811, 717, 451,             |     |          |                                                          |
|    | 10.94 | Stilbenoid DP4 | isohopeaphenol         | 905 | 359                        | 907 | 283,9    | Standard                                                 |
| 38 | 11.47 | Stilbenoid DP4 | resveratrol tetramer 1 | 905 |                            | 907 | 285      | Püssa <i>et al.</i> , 2006, Flamini <i>et al.</i> , 2013 |
| 39 | 11.86 | Stilbenoid DP4 | resveratrol tetramer 2 | 905 |                            | 907 | 284, 331 | Püssa <i>et al.</i> , 2006, Flamini <i>et al.</i> , 2013 |
| 40 | 12.68 | Stilbenoid DP4 | resveratrol tetramer 3 | 905 | 573                        | 907 | 323      | Püssa <i>et al.</i> , 2006, Flamini <i>et al.</i> , 2013 |
| 41 | 14.32 | Stilbenoid DP4 | Z/E-vitisinB           | 905 | 799, 359                   | 907 | 322      | Standard                                                 |
| 42 | 10.40 | Stilbenoid DP4 | viniferol E            | 923 |                            |     |          | Fujii <i>et al.</i> , 2005, Rivière <i>et al.</i> , 2010 |

---



**Table S2.** Non-parametric univariate statistics on vintage and spatial location over the 3 years study and on spatial location into vintage.

| Peak | Compound assignment                 | Year effect |         |     | Spatial effect |         |     | Year-Spatial interaction |         |     |
|------|-------------------------------------|-------------|---------|-----|----------------|---------|-----|--------------------------|---------|-----|
|      |                                     | value       | p-value |     | value          | p-value |     | value                    | p-value |     |
| 1    | gallic acid                         | 523         | 0.001   | *** | 326            | 0.001   | *** | 768                      | 0.001   | *** |
| 2    | caffeic acid                        | 10989       | 0.001   | *** | 3322           | 0.001   | *** | 7801                     | 0.001   | *** |
| 3    | <i>E</i> -resveratrol               | 60519       | 0.001   | *** | 3949           | 0.001   | *** | 83646                    | 0.001   | *** |
| 4    | <i>E</i> -piceatannol               | 49504       | 0.001   | *** | 2723           | 0.001   | *** | 144193                   | 0.001   | *** |
| 5    | catechin                            | 2739        | 0.001   | *** | 4213           | 0.001   | *** | 5693                     | 0.001   | *** |
| 6    | epicatechin                         | 5265        | 0.001   | *** | 6796           | 0.001   | *** | 4677                     | 0.001   | *** |
| 7    | gallo catechin                      | 8156        | 0.001   | *** | 7339           | 0.001   | *** | 13479                    | 0.001   | *** |
| 8    | <i>E</i> -piceid                    | 28130       | 0.001   | *** | 13128          | 0.001   | *** | 46391                    | 0.001   | *** |
| 9    | epicatechin-3- <i>O</i> -gallate    | 9154        | 0.001   | *** | 9532           | 0.001   | *** | 6992                     | 0.001   | *** |
| 10   | astilbin                            | 413         | 0.001   | *** | 4310           | 0.001   | *** | 4832                     | 0.001   | *** |
| 11   | <i>Z</i> -resveratrol dimer1        | 18403       | 0.001   | *** | 16043          | 0.001   | *** | 54679                    | 0.001   | *** |
| 12   | <i>Z</i> -resveratrol dimer2        | 11819       | 0.001   | *** | 16561          | 0.001   | *** | 30663                    | 0.001   | *** |
| 13   | <i>E</i> - $\epsilon$ -viniferin    | 3483        | 0.001   | *** | 5691           | 0.001   | *** | 4552                     | 0.001   | *** |
| 14   | <i>E</i> - $\omega$ -viniferin      | 12763       | 0.001   | *** | 29155          | 0.001   | *** | 49289                    | 0.001   | *** |
| 15   | <i>E</i> - $\delta$ -viniferin      | 15169       | 0.001   | *** | 8070           | 0.001   | *** | 23760                    | 0.001   | *** |
| 16   | quercetin-3- <i>O</i> -glucoside    | 141         | 0.001   | *** | 1985           | 0.001   | *** | 4993                     | 0.001   | *** |
| 17   | ampelopsin A                        | 1600        | 0.001   | *** | 1934           | 0.001   | *** | 4584                     | 0.001   | *** |
| 18   | scirpusin A1                        | 1068        | 0.001   | *** | 963            | 0.001   | *** | 3044                     | 0.001   | *** |
| 19   | scirpusin A2                        | 9819        | 0.001   | *** | 4645           | 0.001   | *** | 13001                    | 0.001   | *** |
| 20   | restrytisol A                       | 29229       | 0.001   | *** | 22672          | 0.001   | *** | 59611                    | 0.001   | *** |
| 21   | restrytisol B                       | 931         | 0.001   | *** | 1757           | 0.001   | *** | 4557                     | 0.001   | *** |
| 22   | restrytisol 3                       | 11082       | 0.001   | *** | 3899           | 0.001   | *** | 45796                    | 0.001   | *** |
| 23   | quercetin-3- <i>O</i> -glucuronide  | 208         | 0.001   | *** | 1057           | 0.001   | *** | 8253                     | 0.001   | *** |
| 24   | procyanidin B1                      | 1600        | 0.001   | *** | 2958           | 0.001   | *** | 4653                     | 0.001   | *** |
| 25   | procyanidin B2                      | 6397        | 0.001   | *** | 4829           | 0.001   | *** | 6977                     | 0.001   | *** |
| 26   | procyanidin B3                      | 3317        | 0.001   | *** | 2107           | 0.001   | *** | 2413                     | 0.001   | *** |
| 27   | procyanidin B4                      | 9537        | 0.001   | *** | 5349           | 0.001   | *** | 4050                     | 0.001   | *** |
| 28   | resveratrol dimer glycoside         | 3021        | 0.001   | *** | 4516           | 0.001   | *** | 5416                     | 0.001   | *** |
| 29   | $\alpha$ -viniferin                 | 11975       | 0.001   | *** | 93817          | 0.001   | *** | 378207                   | 0.001   | *** |
| 30   | resveratrol trimer 1                | 165         | 0.001   | *** | 22515          | 0.001   | *** | 20492                    | 0.001   | *** |
| 31   | resveratrol trimer 2                | 497         | 0.001   | *** | 3178           | 0.001   | *** | 3967                     | 0.001   | *** |
| 32   | <i>E</i> -miyabenol C               | 10074       | 0.001   | *** | 39680          | 0.001   | *** | 55915                    | 0.001   | *** |
| 33   | resveratrol trimer 3                | 11784       | 0.001   | *** | 13752          | 0.001   | *** | 29938                    | 0.001   | *** |
| 34   | procyanidin trimer                  | 1378        | 0.001   | *** | 1323           | 0.001   | *** | 2113                     | 0.001   | *** |
| 35   | dehydrogenated resveratrol tetramer | 357         | 0.001   | *** | 7367           | 0.001   | *** | 16547                    | 0.001   | *** |
| 36   | hopeaphenol                         | 13          | 0.003   | **  | 1527           | 0.001   | *** | 4791                     | 0.001   | *** |
| 37   | isohopeaphenol                      | 7543        | 0.001   | *** | 8290           | 0.001   | *** | 22668                    | 0.001   | *** |
| 38   | resveratrol tetramer 1              | 7           | 0.042   | *   | 1506           | 0.001   | *** | 3180                     | 0.001   | *** |
| 39   | resveratrol tetramer 2              | 8979        | 0.001   | *** | 7698           | 0.001   | *** | 13346                    | 0.001   | *** |
| 40   | resveratrol tetramer 3              | 392         | 0.001   | *** | 7390           | 0.001   | *** | 11943                    | 0.001   | *** |
| 41   | <i>Z/E</i> -vitisinB                | 663         | 0.001   | *** | 1846           | 0.001   | *** | 14696                    | 0.001   | *** |
| 42   | viniferol E                         | 46          | 0.001   | *** | 2602           | 0.001   | *** | 6804                     | 0.001   | *** |
|      | Total polyphenols                   | 17352       | 0.001   | *** | 3597           | 0.001   | *** | 5611                     | 0.001   | *** |
